# Supplementary material for: Farmers' Perception about Climate Change, its Impact on Livestock Health, and Adaptation Measures in Gandaki Province, Nepal
Source: Research Square preprint supplement (doi:10.21203/rs.3.rs-6669581/v1), 2025-06-13
Supplement: Supplementary file 1 [file 318e85a291312fda1639180d.pdf]

## Survey Questionnaire (English)

# Impact of Climate Change on Livestock and Adaptation Strategies in the Gandaki Province of Nepal

(Survey Questionnaire, 2022)

### Research Team

Vikash Kumar KC, Tribhuvan University  
Ananta Raj Dhungana, Pokhara University  
Purna Bahadur Khand, Pokhara University

This project is funded by Research Directorate, Tribhuvan University. My name is .....  
..... We are conducting a survey in Western Nepal to learn about *Impact of Climate Change on Livestock and Adaptation Strategies in the Gandaki Province of Nepal*. You have been chosen by chance to participate in the study. I want to assure you that all of your views will be kept strictly secret. You have the right to stop the interview at any time, or to skip any questions that you don't want to answer. There is no right or wrong answer and you can put your views independently. Many respondents have found useful to have the opportunity to talk and discuss on it. Your participation is completely voluntary but your experiences could be very helpful to formulate the policy against the climate change impact in Nepal. The interview takes approximately 20 – 30 minutes to complete. Thank you in advance for your cooperation.

-----  
Survey Enumerator

|                                                                                                                                                                    |                                                                                                                                                    |
|--------------------------------------------------------------------------------------------------------------------------------------------------------------------|----------------------------------------------------------------------------------------------------------------------------------------------------|
| <b>Initial Information</b>                                                                                                                                         |                                                                                                                                                    |
| 1                                                                                                                                                                  | Interview date:                                                                                                                                    |
| 2                                                                                                                                                                  | Interviewee name:                                                                                                                                  |
| 3                                                                                                                                                                  | Province:                                                                                                                                          |
| 4                                                                                                                                                                  | District:                                                                                                                                          |
| 5                                                                                                                                                                  | Village/Municipality                                                                                                                               |
| 6                                                                                                                                                                  | Ward:                                                                                                                                              |
| 7                                                                                                                                                                  | Tole:                                                                                                                                              |
| 8                                                                                                                                                                  | Household number:                                                                                                                                  |
| 9                                                                                                                                                                  | Longitude:                                                                                                                                         |
| 10                                                                                                                                                                 | Latitude:                                                                                                                                          |
| 11                                                                                                                                                                 | Elevation:                                                                                                                                         |
| <b>Background Information</b>                                                                                                                                      |                                                                                                                                                    |
| Please give the details of person who lives this place since at least last 15 years, 45 years old or more and who is engaged in agriculture and livestock farming. |                                                                                                                                                    |
| 12                                                                                                                                                                 | Respondent name and contact number:                                                                                                                |
| 13                                                                                                                                                                 | Relationship of respondent to the household head:<br>1. HH Head    2. Spouse    3. Son/Daughter    4. Son/Daughter in law    5. Other<br>(Specify) |
| 14                                                                                                                                                                 | Sex of respondent:<br>Male    2. Female    3. Other                                                                                                |
| 15                                                                                                                                                                 | Age of respondent:                                                                                                                                 |
| 16                                                                                                                                                                 | Marital status:<br>1. Unmarried    2. Married    3. Separated    4. Divorced    5. Widow/Widower                                                   |
| 17                                                                                                                                                                 | Religion:<br>1. Hindu    2. Buddha    3. Islam    4. Kirat    5. Cristian    6. Other                                                              |
| 18                                                                                                                                                                 | Caste and ethnicity:                                                                                                                               |
| 19                                                                                                                                                                 | Level of education:<br>1. Illiterate    2. Literate (informal)    3. Basic (1-8)    4. Secondary (9-12)    5. Higher                               |
| 20                                                                                                                                                                 | Profession other than agriculture and livestock farming (if any):<br>1. Govt job    2. Private job    3. Business    4. Other (specify)            |
| 21                                                                                                                                                                 | Annual income of respondent (NRs in thousand):                                                                                                     |
| 22                                                                                                                                                                 | Annual expenditure of respondent (NRs in thousand):                                                                                                |
| <b>Household Information</b>                                                                                                                                       |                                                                                                                                                    |
| 23                                                                                                                                                                 | Household size:                                                                                                                                    |
| 24                                                                                                                                                                 | Family type:<br>1. Nuclear    2. Joint                                                                                                             |
| 25                                                                                                                                                                 | Annual income of household (NRs in thousand):                                                                                                      |
| 26                                                                                                                                                                 | Annual expenditure of household (NRs in thousand):                                                                                                 |
| 27                                                                                                                                                                 | Food sufficiency status (in month):                                                                                                                |
| <b>Land holding in Agriculture and livestock</b>                                                                                                                   |                                                                                                                                                    |

|    |                                                                                      |            |                  |    |                |        |
|----|--------------------------------------------------------------------------------------|------------|------------------|----|----------------|--------|
| 28 | Total land holdings:<br>1. Agriculture (ropani/bigha)<br>2. Livestock (ropani/bigha) |            |                  |    |                |        |
| 29 | Agricultural Production and Livestock Holdings (major five):                         |            |                  |    |                |        |
|    | SN                                                                                   | Crops type | Annul Production | SN | Livestock type | Number |
|    | 1                                                                                    |            |                  | 1  |                |        |
|    | 2                                                                                    |            |                  | 2  |                |        |
|    | 3                                                                                    |            |                  | 3  |                |        |
|    | 4                                                                                    |            |                  | 4  |                |        |
|    | 5                                                                                    |            |                  | 5  |                |        |
| 30 | Loan for livestock farming<br>1. Yes 2. No<br>If yes how much?                       |            |                  |    |                |        |

| People's perception on variability of climate change (compared with last 15 years)<br>(1 = Strongly Disagree, 2 = Disagree, 3 = Neutral, 4 = Agree, 5 = Strongly Agree) |                                                                 |   |   |   |   |   |
|-------------------------------------------------------------------------------------------------------------------------------------------------------------------------|-----------------------------------------------------------------|---|---|---|---|---|
| 31                                                                                                                                                                      | Annual average maximum temperature has been increased.          | 1 | 2 | 3 | 4 | 5 |
| 32                                                                                                                                                                      | Annual average minimum temperature has been decreased.          | 1 | 2 | 3 | 4 | 5 |
| 33                                                                                                                                                                      | Summer average maximum temperature has been increased.          | 1 | 2 | 3 | 4 | 5 |
| 34                                                                                                                                                                      | Summer average minimum temperature has been decreased.          | 1 | 2 | 3 | 4 | 5 |
| 35                                                                                                                                                                      | Winter average maximum temperature has been increased.          | 1 | 2 | 3 | 4 | 5 |
| 36                                                                                                                                                                      | Winter average minimum temperature has been decreased.          | 1 | 2 | 3 | 4 | 5 |
| 37                                                                                                                                                                      | Timing of rainfall has been changed.                            | 1 | 2 | 3 | 4 | 5 |
| 38                                                                                                                                                                      | Amount of rainfall has been changed.                            | 1 | 2 | 3 | 4 | 5 |
| 39                                                                                                                                                                      | Annual average rainfall has been decreased.                     | 1 | 2 | 3 | 4 | 5 |
| 40                                                                                                                                                                      | Summer average rainfall has been decreased.                     | 1 | 2 | 3 | 4 | 5 |
| 41                                                                                                                                                                      | Winger average rainfall has been decreased.                     | 1 | 2 | 3 | 4 | 5 |
| 42                                                                                                                                                                      | Number of draught incident has been increased.                  | 1 | 2 | 3 | 4 | 5 |
| 43                                                                                                                                                                      | Number of flood incident has been increased.                    | 1 | 2 | 3 | 4 | 5 |
| 44                                                                                                                                                                      | Water availability has been decreased.                          | 1 | 2 | 3 | 4 | 5 |
| 45                                                                                                                                                                      | Incidence of diseases has been increased in agriculture sector. | 1 | 2 | 3 | 4 | 5 |
| 46                                                                                                                                                                      | Incidence of diseases has been increased in livestock sector.   | 1 | 2 | 3 | 4 | 5 |

| People's perception about the impact of climate change on Livestock<br>(1 = Strongly Disagree, 2 = Disagree, 3 = Neutral, 4 = Agree, 5 = Strongly Agree) |                                       |   |   |   |   |   |
|----------------------------------------------------------------------------------------------------------------------------------------------------------|---------------------------------------|---|---|---|---|---|
| 47                                                                                                                                                       | Feed crop availability has decreased. | 1 | 2 | 3 | 4 | 5 |
| 48                                                                                                                                                       | Feed crop quality has decreased.      | 1 | 2 | 3 | 4 | 5 |
| 49                                                                                                                                                       | Forage availability has decreased.    | 1 | 2 | 3 | 4 | 5 |
| 50                                                                                                                                                       | Forage quality has decreased.         | 1 | 2 | 3 | 4 | 5 |
| 51                                                                                                                                                       | Water quality has decreased.          | 1 | 2 | 3 | 4 | 5 |
| 52                                                                                                                                                       | Number of livestock has decreased     | 1 | 2 | 3 | 4 | 5 |

|    |                                                       |   |   |   |   |   |
|----|-------------------------------------------------------|---|---|---|---|---|
| 53 | Weight of livestock has decreased                     | 1 | 2 | 3 | 4 | 5 |
| 54 | Livestock production has decreased                    | 1 | 2 | 3 | 4 | 5 |
| 55 | Quality of milk has decreased.                        | 1 | 2 | 3 | 4 | 5 |
| 56 | Quality of meat has decreased.                        | 1 | 2 | 3 | 4 | 5 |
| 57 | Summer hotness has increased milk production.         | 1 | 2 | 3 | 4 | 5 |
| 58 | Summer hotness has increased meat production.         | 1 | 2 | 3 | 4 | 5 |
| 59 | Winter coldness has decreased milk production.        | 1 | 2 | 3 | 4 | 5 |
| 60 | Winter coldness has decreased meat production.        | 1 | 2 | 3 | 4 | 5 |
| 61 | Incidence of disease in livestock has increased.      | 1 | 2 | 3 | 4 | 5 |
| 62 | Incidence of new diseases in livestock has increased. | 1 | 2 | 3 | 4 | 5 |
| 63 | Cost of veterinary services has increased.            | 1 | 2 | 3 | 4 | 5 |
| 64 | Morbidity of livestock has increased.                 | 1 | 2 | 3 | 4 | 5 |
| 65 | Longevity of livestock has decreased.                 | 1 | 2 | 3 | 4 | 5 |
| 66 | Availability of pastoral land has decreased.          | 1 | 2 | 3 | 4 | 5 |
| 67 | Surrounding flora has decreased.                      | 1 | 2 | 3 | 4 | 5 |
| 68 | New invasive flora has increased.                     | 1 | 2 | 3 | 4 | 5 |
| 69 | Diversity of birds has decreased.                     | 1 | 2 | 3 | 4 | 5 |
| 70 | Diversity of animals has decreased.                   | 1 | 2 | 3 | 4 | 5 |
| 71 | Environment quality has degraded.                     | 1 | 2 | 3 | 4 | 5 |

| <b>People's adaptation strategies against the impact of climate change on Livestock</b><br>(1 = No, 2 = Too little, 3 = Little, 4 = Moderate, 5 = As needed) |                                                  |   |   |   |   |   |
|--------------------------------------------------------------------------------------------------------------------------------------------------------------|--------------------------------------------------|---|---|---|---|---|
| <b>Nutritional Strategies Change</b>                                                                                                                         |                                                  |   |   |   |   |   |
| 72                                                                                                                                                           | Changed the composition of feed                  | 1 | 2 | 3 | 4 | 5 |
| 73                                                                                                                                                           | Fed vitamin and minerals                         | 1 | 2 | 3 | 4 | 5 |
| 74                                                                                                                                                           | Fed additional nutrients                         | 1 | 2 | 3 | 4 | 5 |
| 75                                                                                                                                                           | Changed feeding time                             | 1 | 2 | 3 | 4 | 5 |
| 76                                                                                                                                                           | Changed feeding frequency                        | 1 | 2 | 3 | 4 | 5 |
| 77                                                                                                                                                           | Dewormed livestock                               | 1 | 2 | 3 | 4 | 5 |
| <b>Income-related responses</b>                                                                                                                              |                                                  |   |   |   |   |   |
| 78                                                                                                                                                           | Participated in crop insurance schemes.          | 1 | 2 | 3 | 4 | 5 |
| 79                                                                                                                                                           | Participated in livestock insurance schemes.     | 1 | 2 | 3 | 4 | 5 |
| 80                                                                                                                                                           | Involved in credit schemes for crops.            | 1 | 2 | 3 | 4 | 5 |
| 81                                                                                                                                                           | Involved in credit schemes for livestock.        | 1 | 2 | 3 | 4 | 5 |
| 82                                                                                                                                                           | Adapted income diversification.                  | 1 | 2 | 3 | 4 | 5 |
| 83                                                                                                                                                           | Involved in income generation activities.        | 1 | 2 | 3 | 4 | 5 |
| 84                                                                                                                                                           | Involved in cost reducing activities.            | 1 | 2 | 3 | 4 | 5 |
| <b>Institutional changes</b>                                                                                                                                 |                                                  |   |   |   |   |   |
| 85                                                                                                                                                           | Received agricultural services.                  | 1 | 2 | 3 | 4 | 5 |
| 86                                                                                                                                                           | Received veterinary services.                    | 1 | 2 | 3 | 4 | 5 |
| 87                                                                                                                                                           | Benefited from decreased tax provision in crops. | 1 | 2 | 3 | 4 | 5 |

|                                                            |                                                             |   |   |   |   |   |
|------------------------------------------------------------|-------------------------------------------------------------|---|---|---|---|---|
| 88                                                         | Benefited from decreased tax provision in livestock.        | 1 | 2 | 3 | 4 | 5 |
| 89                                                         | Benefited from subsidy provision in crops.                  | 1 | 2 | 3 | 4 | 5 |
| 90                                                         | Benefited from subsidy provision in livestock.              | 1 | 2 | 3 | 4 | 5 |
| 91                                                         | Received crop insurance subsidies.                          | 1 | 2 | 3 | 4 | 5 |
| 92                                                         | Received livestock insurance subsidies.                     | 1 | 2 | 3 | 4 | 5 |
| 93                                                         | Received training of production and conservation of feed.   | 1 | 2 | 3 | 4 | 5 |
| <b>Science and technology advances in livestock sector</b> |                                                             |   |   |   |   |   |
| 94                                                         | Adapted new crop varieties.                                 | 1 | 2 | 3 | 4 | 5 |
| 95                                                         | Adapted new livestock feeds.                                | 1 | 2 | 3 | 4 | 5 |
| 96                                                         | Improved water management system.                           | 1 | 2 | 3 | 4 | 5 |
| 97                                                         | Improved animal health technology (preventive/curative).    | 1 | 2 | 3 | 4 | 5 |
| 98                                                         | Produced energy crops.                                      | 1 | 2 | 3 | 4 | 5 |
| 99                                                         | Shifted to less water consuming forages.                    | 1 | 2 | 3 | 4 | 5 |
| 100                                                        | Shifted to less maturation time forages.                    | 1 | 2 | 3 | 4 | 5 |
| <b>Adaptation against high heat/cold</b>                   |                                                             |   |   |   |   |   |
| 101                                                        | Fed hot kudo in winter and cold kudo in summer.             | 1 | 2 | 3 | 4 | 5 |
| 102                                                        | Used modified shade                                         | 1 | 2 | 3 | 4 | 5 |
| 103                                                        | Increased the height of shade.                              | 1 | 2 | 3 | 4 | 5 |
| 104                                                        | Covered the shade.                                          | 1 | 2 | 3 | 4 | 5 |
| 105                                                        | Used fan or cooling system.                                 | 1 | 2 | 3 | 4 | 5 |
| 106                                                        | Increased water intake during periods of high heat.         | 1 | 2 | 3 | 4 | 5 |
| 107                                                        | Diversified crop varieties.                                 | 1 | 2 | 3 | 4 | 5 |
| 108                                                        | Diversified livestock varieties.                            | 1 | 2 | 3 | 4 | 5 |
| <b>Risk Management</b>                                     |                                                             |   |   |   |   |   |
| 109                                                        | Managed feeding system                                      | 1 | 2 | 3 | 4 | 5 |
| 110                                                        | Managed grazing land                                        | 1 | 2 | 3 | 4 | 5 |
| 111                                                        | Adapted pest control                                        | 1 | 2 | 3 | 4 | 5 |
| 112                                                        | Practiced altitude changes (grass land and livestock)       | 1 | 2 | 3 | 4 | 5 |
| 113                                                        | Reduced age to slaughter (except cattle)                    | 1 | 2 | 3 | 4 | 5 |
| 114                                                        | Practiced the extended lactation period                     | 1 | 2 | 3 | 4 | 5 |
| 115                                                        | Minimized diseases outbreak                                 | 1 | 2 | 3 | 4 | 5 |
| 116                                                        | Changed irrigation system                                   | 1 | 2 | 3 | 4 | 5 |
| 117                                                        | Practiced mixed crop-livestock systems                      | 1 | 2 | 3 | 4 | 5 |
| 118                                                        | Practiced agroforestry (trees, crops and pastures in a mix) | 1 | 2 | 3 | 4 | 5 |
| <b>Breeding</b>                                            |                                                             |   |   |   |   |   |
| 119                                                        | Changed breed to tropically adopted.                        | 1 | 2 | 3 | 4 | 5 |
| 120                                                        | Adapted more fecund genotype.                               | 1 | 2 | 3 | 4 | 5 |
| 121                                                        | Adapted faster growing genotype.                            | 1 | 2 | 3 | 4 | 5 |
| 122                                                        | Adapted more weighting genotype.                            | 1 | 2 | 3 | 4 | 5 |
| 123                                                        | Adapted milking longevity genotype.                         | 1 | 2 | 3 | 4 | 5 |
| 124                                                        | Adapted more milking genotype.                              | 1 | 2 | 3 | 4 | 5 |
| 125                                                        | Adapted more Cross-breeding with heat tolerant breeds.      | 1 | 2 | 3 | 4 | 5 |

|     |                                                                  |   |   |   |   |   |
|-----|------------------------------------------------------------------|---|---|---|---|---|
| 126 | Adapted cross-breeding with cold tolerant breeds.                | 1 | 2 | 3 | 4 | 5 |
| 127 | Adapted cross-breeding with disease tolerant breeds.             | 1 | 2 | 3 | 4 | 5 |
| 128 | Adapted local breeds for local climatic stress and feed sources. | 1 | 2 | 3 | 4 | 5 |

| <b>Barrier to the adaptation of livestock farmers to climate change</b><br>(1 = Strongly Disagree, 2 = Disagree, 3 = Neutral, 4 = Agree, 5 = Strongly Agree) |                                                    |   |   |   |   |   |
|--------------------------------------------------------------------------------------------------------------------------------------------------------------|----------------------------------------------------|---|---|---|---|---|
| 129                                                                                                                                                          | Lack of information                                | 1 | 2 | 3 | 4 | 5 |
| 130                                                                                                                                                          | No improved breeds                                 | 1 | 2 | 3 | 4 | 5 |
| 131                                                                                                                                                          | Disease and parasite                               | 1 | 2 | 3 | 4 | 5 |
| 132                                                                                                                                                          | Inadequate capital                                 | 1 | 2 | 3 | 4 | 5 |
| 133                                                                                                                                                          | Inadequate access to water resources               | 1 | 2 | 3 | 4 | 5 |
| 134                                                                                                                                                          | Inadequate forage and pasture                      | 1 | 2 | 3 | 4 | 5 |
| 135                                                                                                                                                          | Inadequate access to veterinary services           | 1 | 2 | 3 | 4 | 5 |
| 136                                                                                                                                                          | Poor infrastructure                                | 1 | 2 | 3 | 4 | 5 |
| 137                                                                                                                                                          | Limited knowledge of management practices          | 1 | 2 | 3 | 4 | 5 |
| 138                                                                                                                                                          | Lack of knowledge about other adaptation options   | 1 | 2 | 3 | 4 | 5 |
| 139                                                                                                                                                          | High prices for essential supplies and commodities | 1 | 2 | 3 | 4 | 5 |
| 140                                                                                                                                                          | Lack of government support                         | 1 | 2 | 3 | 4 | 5 |

### Gender involvement in Livestock rearing

| Activities |                                       | Activities |      | Person |      | Time Taken |
|------------|---------------------------------------|------------|------|--------|------|------------|
|            |                                       | Difficult  | Easy | Female | Male |            |
| 142        | Cleaning Dung                         |            |      |        |      |            |
| 143        | Preparing and feeding <i>Kudo</i>     |            |      |        |      |            |
| 144        | Milking                               |            |      |        |      |            |
| 145        | Cutting and feeding grass             |            |      |        |      |            |
| 146        | Bringing fodder and forage            |            |      |        |      |            |
| 147        | Bathing                               |            |      |        |      |            |
| 148        | Selling milk to dairy                 |            |      |        |      |            |
| 149        | Keeping money after selling milk      |            |      |        |      |            |
| 150        | Keeping money after selling livestock |            |      |        |      |            |
